# Supplementary material for: The importance of an informed choice of CO 2 -equivalence metrics for contrail avoidance
Source: Copernicus journal article supplement (doi:10.5194/acp-24-9401-2024), 2024-09-15

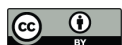

*Supplement of*

## **The importance of an informed choice of CO<sub>2</sub>-equivalence metrics for contrail avoidance**

**Audran Borella et al.**

*Correspondence to:* Audran Borella (audran.borella@ipsl.fr)

The copyright of individual parts of the supplement might differ from the article licence.

## Illustrative case studies of contrail avoidance

This section uses illustrative case studies to clarify Figure 4 and explain the behaviour of CO<sub>2</sub>-equivalence metrics for different magnitudes of EF<sub>contrail</sub>. The median flight of Section 3 (2450 km, 53 tons of CO<sub>2</sub>) is again considered, and we again  
5 assume that it is possible to reroute the flight to avoid forming the persistent contrail with a 1% increase in the CO<sub>2</sub> emissions of the original flight.

Figure S1 illustrates the change in climate impact caused by such a rerouting for two different contrails. In both cases, the climate impact is quantified by combining AGWP, AGTP, or ATR with time horizons ranging from 1 to 100 years. Rerouting is assumed to have been successful with persistent contrail formation being completely avoided, although it  
10 should be noted that this assumption is overly optimistic and cannot be currently guaranteed in any realistic setting. The change in climate impact is quantified as the relative difference between the value of the metric for the rerouted flight and that of the original, contrail-forming flight. A negative relative difference indicates that rerouting provides a net climate benefit for the considered metric: the rerouted flight exerts a weaker radiative forcing (for AGWP) or a smaller temperature change (for AGTP and ATR) than the original flight. Conversely, a positive relative difference indicates that rerouting has  
15 made the net climate impact of the flight worse.

The first case, shown in Figure S1(a), corresponds to the formation of a high-energy contrail, with an energy input to the climate system of  $2.8 \times 10^{11} \text{ J km}^{-1}$  applied to the 2450 km of the flight. That is ten times the energy of the median contrail energy forcing in the dataset, and only 10% of North Atlantic flights input more average contrail energy per kilometre. The decision making in this situation is easy: rerouting would yield a climate benefit, which would persist even with much larger  
20 additional CO<sub>2</sub> emissions. With a 20-year time horizon, rerouting decreases the climate impact by 95% if AGWP and ATR are used, and by about 70% if AGTP is used. With a 100-year time horizon, the reduction of climate impact exceeds 50% for all metrics.

The second case, shown in Figure S1(b), corresponds to the formation of a low-energy contrail with energy of  $2.9 \times 10^{10} \text{ J km}^{-1}$ , which is the energy of the median contrail energy forcing in the dataset. In this case again, rerouting to  
25 avoid the contrail leads to a climate benefit. But the quantification of that climate benefit strongly depends on the choice of CO<sub>2</sub>-equivalence metric. According to AGTP, the climate benefit associated with rerouting is less than 20% for time horizons longer than 20 years, falling to 10% at 100 years. AGWP and ATR are more permissive and indicate a reduction of about 60% of the climate impact at 20 years, decreasing to 30% at 100 years.

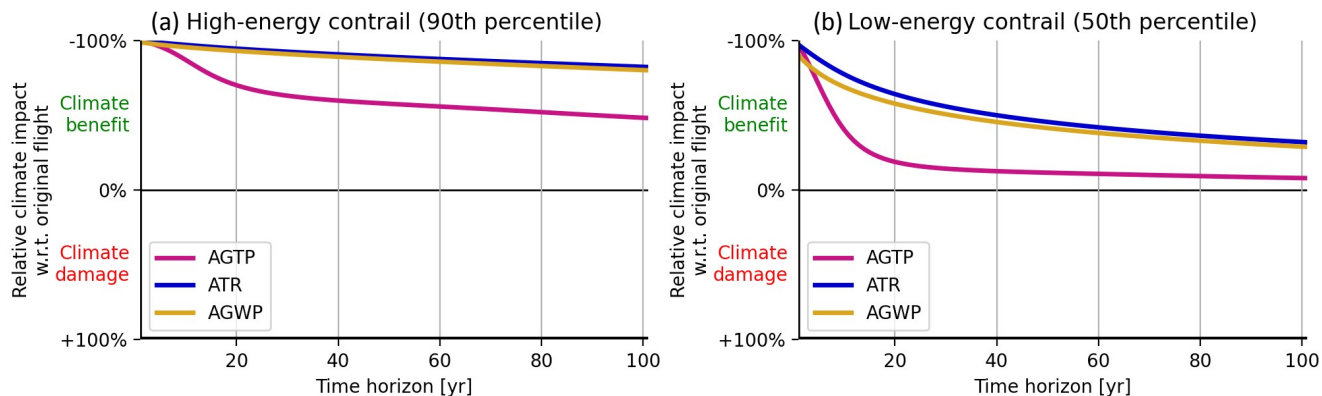

30 **Figure S1:** Change in climate impact due to rerouting a flight to avoid contrail formation as a function of time horizon, in years, according to different CO<sub>2</sub>-equivalence metrics. The original flight emits 53 tonnes of CO<sub>2</sub> and is assumed to be successfully rerouted to avoid the formation of a persistent contrail of energy **(a)**  $2.8 \times 10^{11} \text{ J km}^{-1}$  or **(b)**  $2.9 \times 10^{10} \text{ J km}^{-1}$ , assuming a contrail efficacy of 0.35. Contrail energy forcing is applied over the whole 2450-km flight. The climate outcome of rerouting is shown as the relative difference between the rerouted flight climate impact and the original flight one for three metric definitions, AGTP (purple), ATR (blue), and AGWP (orange).

35

In addition to these two cases of contrail avoidance, it is informative to consider a different situation. As stated above, 20% of the persistent contrails formed in the North Atlantic have a negative energy forcing, thereby cooling the climate. Contrail radiative forcing uncertainties are such that we cannot yet confidently predict that a particular ISSR would lead to the formation of strongly warming or cooling persistent contrails. This is illustrated in Table 2 of Teoh et al. (2020), whereby the

40 2.5 to 97.5% confidence interval of the energy of a “big hit” contrail of energy  $4.33 \times 10^{15} \text{ J}$  spans a range from  $-1 \times 10^{13}$  to  $17.1 \times 10^{15} \text{ J}$ , so includes a low probability that the contrail is in fact cooling. Figure S2 illustrates the case where the original flight would have formed a contrail with an energy of  $-6.0 \times 10^9 \text{ J km}^{-1}$ , which is about a fifth of the median contrail in the dataset, with a negative sign. 10% of contrails from transatlantic flights cool more than this value. As before, rerouting the aircraft would avoid the formation of that contrail. As expected, rerouting that flight damages the climate, for all metrics and

45 time horizon considered. The increase in climate impact exceeds 35% and 55% for time horizons shorter than 20 years when using AGWP and ATR, respectively, with an increase of about 10% at a time horizon of 100 years. Climate damage is less according to AGTP, at 6% at 20 years and about 3% at 100 years.

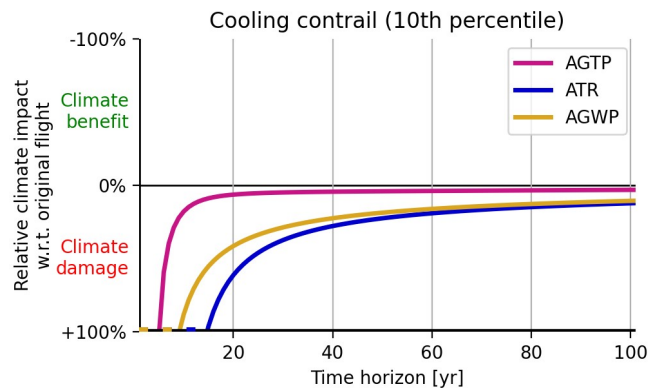

50 **Figure S2:** As for Figure S1, but for a change in climate impact due to rerouting a flight that would have formed a cooling contrail of energy  $-6.0 \times 10^9 \text{ J km}^{-1}$ .

Those idealised cases suggest that the three  $\text{CO}_2$ -equivalence metrics give similar information for the decision to reroute or not but lead to very different quantifications of the climate outcome. AGTP<sub>H</sub> generally leads to a smaller estimate of the climate benefit or damage than the time-integrated metrics AGWP<sub>H</sub> and ATR<sub>H</sub>. Short time horizons yield to larger climate outcomes than long time horizons, with differences being especially large when contrail energy is low. There is a range of contrail EF where at least one  $\text{CO}_2$ -equivalence metric leads to a different rerouting decision than the others. For our typical flight and our nine  $\text{CO}_2$ -equivalence metrics, that range spans the 24<sup>th</sup> to the 31<sup>st</sup> percentiles, i.e. 7% of the contrail-forming flights. This range represents very low-energy contrails, with EF per flown kilometre from  $1.7 \times 10^8$  to  $3.1 \times 10^9 \text{ J km}^{-1}$ . This second value is about a tenth of the median contrail energy forcing in the dataset.

55

60

## Values corresponding to Figures 3 and 5 of the main text.

65 **Table S1:** Summary of the OSCAR calculation of AGWP, in  $\text{mW m}^{-2} \text{ yr}$ , AGTP, in  $\mu\text{K}$ , and ATR, in  $\langle\mu\text{K}\rangle$ , due to  $\text{CO}_2$  emissions and warming and cooling contrail formation for the flights that crossed the North Atlantic sector in 2019 (Teoh et al., 2022). Calculations are given for three time horizons: 20, 50, and 100 years. Percentages in brackets are relative to the first column “All flights”. For ATR, the unit is denoted  $\langle\mu\text{K}\rangle$  to distinguish an average over the time horizon from an endpoint temperature change.

| RF or warming caused by specific climate forcer | All climate forcings                | $\text{CO}_2$ emissions                   | Warming contrails ( $\text{EF}_{\text{contrail}} > 0 \text{ J km}^{-1}$ ) | Cooling contrails ( $\text{EF}_{\text{contrail}} < 0 \text{ J km}^{-1}$ ) |
|-------------------------------------------------|-------------------------------------|-------------------------------------------|---------------------------------------------------------------------------|---------------------------------------------------------------------------|
| AGWP100                                         | $3.94 \text{ mW m}^{-2} \text{ yr}$ | $2.32 \text{ mW m}^{-2} \text{ yr}$ (59%) | $1.70 \text{ mW m}^{-2} \text{ yr}$ (43%)                                 | $-0.07 \text{ mW m}^{-2} \text{ yr}$ (-2%)                                |
| AGWP50                                          | $2.91 \text{ mW m}^{-2} \text{ yr}$ | $1.32 \text{ mW m}^{-2} \text{ yr}$ (45%) | $1.66 \text{ mW m}^{-2} \text{ yr}$ (57%)                                 | $-0.07 \text{ mW m}^{-2} \text{ yr}$ (-2%)                                |
| AGWP20                                          | $2.22 \text{ mW m}^{-2} \text{ yr}$ | $0.67 \text{ mW m}^{-2} \text{ yr}$ (30%) | $1.62 \text{ mW m}^{-2} \text{ yr}$ (73%)                                 | $-0.07 \text{ mW m}^{-2} \text{ yr}$ (-3%)                                |
| AGTP100                                         | $14.1 \mu\text{K}$                  | $12.1 \mu\text{K}$ (86%)                  | $2.06 \mu\text{K}$ (15%)                                                  | $-0.09 \mu\text{K}$ (-1%)                                                 |
| AGTP50                                          | $13.7 \mu\text{K}$                  | $11.0 \mu\text{K}$ (80%)                  | $2.73 \mu\text{K}$ (20%)                                                  | $-0.12 \mu\text{K}$ (-1%)                                                 |
| AGTP20                                          | $17.2 \mu\text{K}$                  | $12.2 \mu\text{K}$ (71%)                  | $5.17 \mu\text{K}$ (30%)                                                  | $-0.22 \mu\text{K}$ (-1%)                                                 |
| ATR100                                          | $20.9 \langle\mu\text{K}\rangle$    | $11.5 \langle\mu\text{K}\rangle$ (55%)    | $9.75 \langle\mu\text{K}\rangle$ (47%)                                    | $-0.42 \langle\mu\text{K}\rangle$ (-2%)                                   |
| ATR50                                           | $28.0 \langle\mu\text{K}\rangle$    | $11.6 \langle\mu\text{K}\rangle$ (41%)    | $17.2 \langle\mu\text{K}\rangle$ (61%)                                    | $-0.74 \langle\mu\text{K}\rangle$ (-3%)                                   |
| ATR20                                           | $48.2 \langle\mu\text{K}\rangle$    | $12.0 \langle\mu\text{K}\rangle$ (25%)    | $37.8 \langle\mu\text{K}\rangle$ (78%)                                    | $-1.63 \langle\mu\text{K}\rangle$ (-3%)                                   |

**Table S2:** As Table S1, but now separating flights into categories depending on their overall climate impact. The number of flights for the last two categories depends on the metric.

| Flight subset     | All flights                | Contrail-forming flights         | Flights forming warming contrails | Flights forming cooling contrails that cool less than CO <sub>2</sub> warming | Flights forming cooling contrails that cool more than CO <sub>2</sub> warming |
|-------------------|----------------------------|----------------------------------|-----------------------------------|-------------------------------------------------------------------------------|-------------------------------------------------------------------------------|
| Number of flights | 477,923                    | 260,854 (55%)                    | 208,965 (44%)                     |                                                                               |                                                                               |
| AGWP100           | 3.94 mW m <sup>-2</sup> yr | 2.99 mW m <sup>-2</sup> yr (76%) | 2.78 mW m <sup>-2</sup> yr (71%)  | 0.21 mW m <sup>-2</sup> yr (5%)<br>47,306 flights                             | -0.015 mW m <sup>-2</sup> yr<br>4,583 flights                                 |
| AGWP50            | 2.91 mW m <sup>-2</sup> yr | 2.37 mW m <sup>-2</sup> yr (81%) | 2.28 mW m <sup>-2</sup> yr (78%)  | 0.11 mW m <sup>-2</sup> yr (4%)<br>43,417 flights                             | -0.025 mW m <sup>-2</sup> yr<br>8,472 flights                                 |
| AGWP20            | 2.22 mW m <sup>-2</sup> yr | 1.94 mW m <sup>-2</sup> yr (87%) | 1.93 mW m <sup>-2</sup> yr (87%)  | 0.05 mW m <sup>-2</sup> yr (2%)<br>37,717 flights                             | -0.038 mW m <sup>-2</sup> yr<br>14,172 flights                                |
| AGTP100           | 14.1 μK                    | 9.00 μK (64%)                    | 7.70 μK (55%)                     | 1.30 μK (9%)<br>51,649 flights                                                | -0.001 μK<br>240 flights                                                      |
| AGTP50            | 13.7 μK                    | 9.03 μK (66%)                    | 7.88 μK (58%)                     | 1.15 μK (8%)<br>51,272 flights                                                | -0.003 μK<br>617 flights                                                      |
| AGTP20            | 17.2 μK                    | 12.1 μK (70%)                    | 10.9 μK (63%)                     | 1.20 μK (7%)<br>49,919 flights                                                | -0.020 μK<br>1,970 flights                                                    |
| ATR100            | 20.9 <μK>                  | 16.0 <μK> (77%)                  | 15.1 <μK> (72%)                   | 1.00 <μK> (5%)<br>46,352 flights                                              | -0.10<μK><br>5,537 flights                                                    |
| ATR50             | 28.0 <μK>                  | 23.2 <μK> (83%)                  | 22.6 <μK> (81%)                   | 0.89 <μK> (3%)<br>42,062 flights                                              | -0.30<μK><br>9,827 flights                                                    |
| ATR20             | 48.2 <μK>                  | 43.2 <μK> (90%)                  | 43.4 <μK> (90%)                   | 0.75 <μK> (2%)<br>35,210 flights                                              | -1.00<μK><br>16,679 flights                                                   |

**Table S3:** Number of flights flown over the North Atlantic in 2019, out of a total of 260,854 contrail-forming flights, for different categories of climate outcomes of rerouting, depending on the CO<sub>2</sub>-equivalence metric (given as a combination of metric definition and time horizon) and the additional CO<sub>2</sub> emitted to reroute. Rerouting is assumed to be successful, so the rerouted flight does not form a contrail and a contrail would have formed, as predicted, on the original route. Climate benefit happens when the CO<sub>2</sub>-equivalence metric is lower for the rerouted flight than for original flight. Percentages in brackets are calculated with respect to the 1% additional CO<sub>2</sub> scenario in each case. Column 5 gives the absolute climate benefit of all reroutings, with a unit that depends on the CO<sub>2</sub>-equivalence metric. For ATR, the unit is denoted <math>\mu\text{K}</math> to distinguish an average over the time horizon from an endpoint temperature change. The potential “lower risk” rerouting category in the second to last column refers to flights with an energy forcing larger than  $10^{11} \text{ J km}^{-1}$  and whose climate benefit from contrail avoidance is 100 times larger than the climate damage from emitting 1% more CO<sub>2</sub>. The absolute climate benefit from rerouting these flights is indicated in the last column.

| CO <sub>2</sub> -equivalence metric used | Additional CO <sub>2</sub> emitted | Number of reroutings that lead to climate damage | Number of reroutings that lead to climate benefit | Climate benefit (unit is metric-dependent) | Potential “lower risk” rerouting | Climate benefit of potential “lower risk” rerouting |
|------------------------------------------|------------------------------------|--------------------------------------------------|---------------------------------------------------|--------------------------------------------|----------------------------------|-----------------------------------------------------|
| AGWP100                                  | 0%                                 | 51,889 (-25%)                                    | 208,965 (+9%)                                     | 1.62 mW m <sup>-2</sup> yr                 | 143,369                          | 1.66 mW m <sup>-2</sup> yr                          |
|                                          | +1%                                | 69,410                                           | 191,444                                           | 1.61 mW m <sup>-2</sup> yr                 | 89,052                           | 1.49 mW m <sup>-2</sup> yr                          |
|                                          | +2%                                | 74,100 (+7%)                                     | 186,754 (-2%)                                     | 1.60 mW m <sup>-2</sup> yr                 | 55,592                           | 1.24 mW m <sup>-2</sup> yr                          |
|                                          | +5%                                | 83,521 (+20%)                                    | 177,333 (-7%)                                     | 1.56 mW m <sup>-2</sup> yr                 | 19,166                           | 0.69 mW m <sup>-2</sup> yr                          |
| AGWP50                                   | 0%                                 | 51,889 (-22%)                                    | 208,965 (+8%)                                     | 1.59 mW m <sup>-2</sup> yr                 | 143,369                          | 1.62 mW m <sup>-2</sup> yr                          |
|                                          | +1%                                | 66,606                                           | 194,248                                           | 1.58 mW m <sup>-2</sup> yr                 | 111,429                          | 1.56 mW m <sup>-2</sup> yr                          |
|                                          | +2%                                | 70,309 (+6%)                                     | 190,545 (-2%)                                     | 1.57 mW m <sup>-2</sup> yr                 | 81,737                           | 1.42 mW m <sup>-2</sup> yr                          |
|                                          | +5%                                | 77,375 (+16%)                                    | 183,479 (-6%)                                     | 1.55 mW m <sup>-2</sup> yr                 | 38,620                           | 1.01 mW m <sup>-2</sup> yr                          |
| AGWP20                                   | 0%                                 | 51,889 (-19%)                                    | 208,965 (+6%)                                     | 1.55 mW m <sup>-2</sup> yr                 | 143,369                          | 1.58 mW m <sup>-2</sup> yr                          |
|                                          | +1%                                | 63,944                                           | 196,910                                           | 1.54 mW m <sup>-2</sup> yr                 | 129,648                          | 1.56 mW m <sup>-2</sup> yr                          |
|                                          | +2%                                | 66,798 (+4%)                                     | 194,056 (-1%)                                     | 1.54 mW m <sup>-2</sup> yr                 | 109,979                          | 1.51 mW m <sup>-2</sup> yr                          |
|                                          | +5%                                | 72,045 (+13%)                                    | 188,809 (-4%)                                     | 1.53 mW m <sup>-2</sup> yr                 | 68,851                           | 1.30 mW m <sup>-2</sup> yr                          |
| AGTP100                                  | 0%                                 | 51,889 (-36%)                                    | 208,965 (+17%)                                    | 1.97 $\mu\text{K}$                         | 143,369                          | 2.01 $\mu\text{K}$                                  |

|        |     |                |                |                                  |         |                                  |
|--------|-----|----------------|----------------|----------------------------------|---------|----------------------------------|
|        |     |                |                |                                  |         |                                  |
|        | +1% | 81,628         | 179,226        | 1.90 $\mu\text{K}$               | 23,843  | 0.95 $\mu\text{K}$               |
|        | +2% | 91,614 (+12%)  | 169,240 (-6%)  | 1.83 $\mu\text{K}$               | 7,314   | 0.43 $\mu\text{K}$               |
|        | +5% | 111,388 (+36%) | 149,466 (-17%) | 1.62 $\mu\text{K}$               | 899     | 0.07 $\mu\text{K}$               |
| AGTP50 | 0%  | 51,889 (-33%)  | 208,965 (+14%) | 2.61 $\mu\text{K}$               | 143,369 | 2.67 $\mu\text{K}$               |
|        | +1% | 77,528         | 183,326        | 2.55 $\mu\text{K}$               | 37,915  | 1.65 $\mu\text{K}$               |
|        | +2% | 85,797 (+11%)  | 175,057 (-5%)  | 2.49 $\mu\text{K}$               | 14,610  | 0.92 $\mu\text{K}$               |
|        | +5% | 102,181 (+32%) | 158,673 (-13%) | 2.29 $\mu\text{K}$               | 2,259   | 0.22 $\mu\text{K}$               |
| AGTP20 | 0%  | 51,889 (-29%)  | 208,965 (+11%) | 4.95 $\mu\text{K}$               | 143,369 | 5.05 $\mu\text{K}$               |
|        | +1% | 73,026         | 187,828        | 4.88 $\mu\text{K}$               | 62,572  | 3.98 $\mu\text{K}$               |
|        | +2% | 79,169 (+8%)   | 181,685 (-3%)  | 4.81 $\mu\text{K}$               | 31,687  | 2.83 $\mu\text{K}$               |
|        | +5% | 91,667 (+26%)  | 169,187 (-10%) | 4.60 $\mu\text{K}$               | 7,268   | 1.06 $\mu\text{K}$               |
| ATR100 | 0%  | 51,889 (-24%)  | 208,965 (+9%)  | 9.33 $\langle\mu\text{K}\rangle$ | 143,369 | 9.52 $\langle\mu\text{K}\rangle$ |
|        | +1% | 68,602         | 192,252        | 9.27 $\langle\mu\text{K}\rangle$ | 95,378  | 8.77 $\langle\mu\text{K}\rangle$ |
|        | +2% | 73,043 (+6%)   | 187,811 (-2%)  | 9.20 $\langle\mu\text{K}\rangle$ | 62,442  | 7.50 $\langle\mu\text{K}\rangle$ |
|        | +5% | 81,696 (+19%)  | 179,158 (-7%)  | 9.00 $\langle\mu\text{K}\rangle$ | 23,624  | 4.49 $\langle\mu\text{K}\rangle$ |
| ATR50  | 0%  | 51,889 (-21%)  | 208,965 (+7%)  | 16.4 $\langle\mu\text{K}\rangle$ | 143,369 | 16.7 $\langle\mu\text{K}\rangle$ |
|        | +1% | 65,803         | 195,051        | 16.3 $\langle\mu\text{K}\rangle$ | 117,053 | 16.3 $\langle\mu\text{K}\rangle$ |
|        | +2% | 69,355 (+5%)   | 191,499 (-2%)  | 16.3 $\langle\mu\text{K}\rangle$ | 89,518  | 15.1 $\langle\mu\text{K}\rangle$ |
|        | +5% | 75,896 (+15%)  | 184,958 (-5%)  | 16.1 $\langle\mu\text{K}\rangle$ | 45,776  | 11.4 $\langle\mu\text{K}\rangle$ |
| ATR20  | 0%  | 51,889 (-18%)  | 208,965 (+6%)  | 36.2 $\langle\mu\text{K}\rangle$ | 143,369 | 36.9 $\langle\mu\text{K}\rangle$ |
|        | +1% | 62,976         | 197,878        | 36.1 $\langle\mu\text{K}\rangle$ | 134,103 | 36.7 $\langle\mu\text{K}\rangle$ |
|        | +2% | 65,554 (+4%)   | 195,300 (-1%)  | 36.1 $\langle\mu\text{K}\rangle$ | 119,000 | 36.0 $\langle\mu\text{K}\rangle$ |
|        | +5% | 70,285 (+12%)  | 190,569 (-4%)  | 35.8 $\langle\mu\text{K}\rangle$ | 81,948  | 32.4 $\langle\mu\text{K}\rangle$ |



85 **Figure S3:** Figure 4 shows the climate outcome of rerouting in terms of the AGTP100. The Figures below show the climate outcome expressed in terms of the other eight CO<sub>2</sub>-equivalence metrics: AGWP20, AGWP50, AGWP100, ATR20, ATR50, ATR100, AGTP20, and AGTP50.

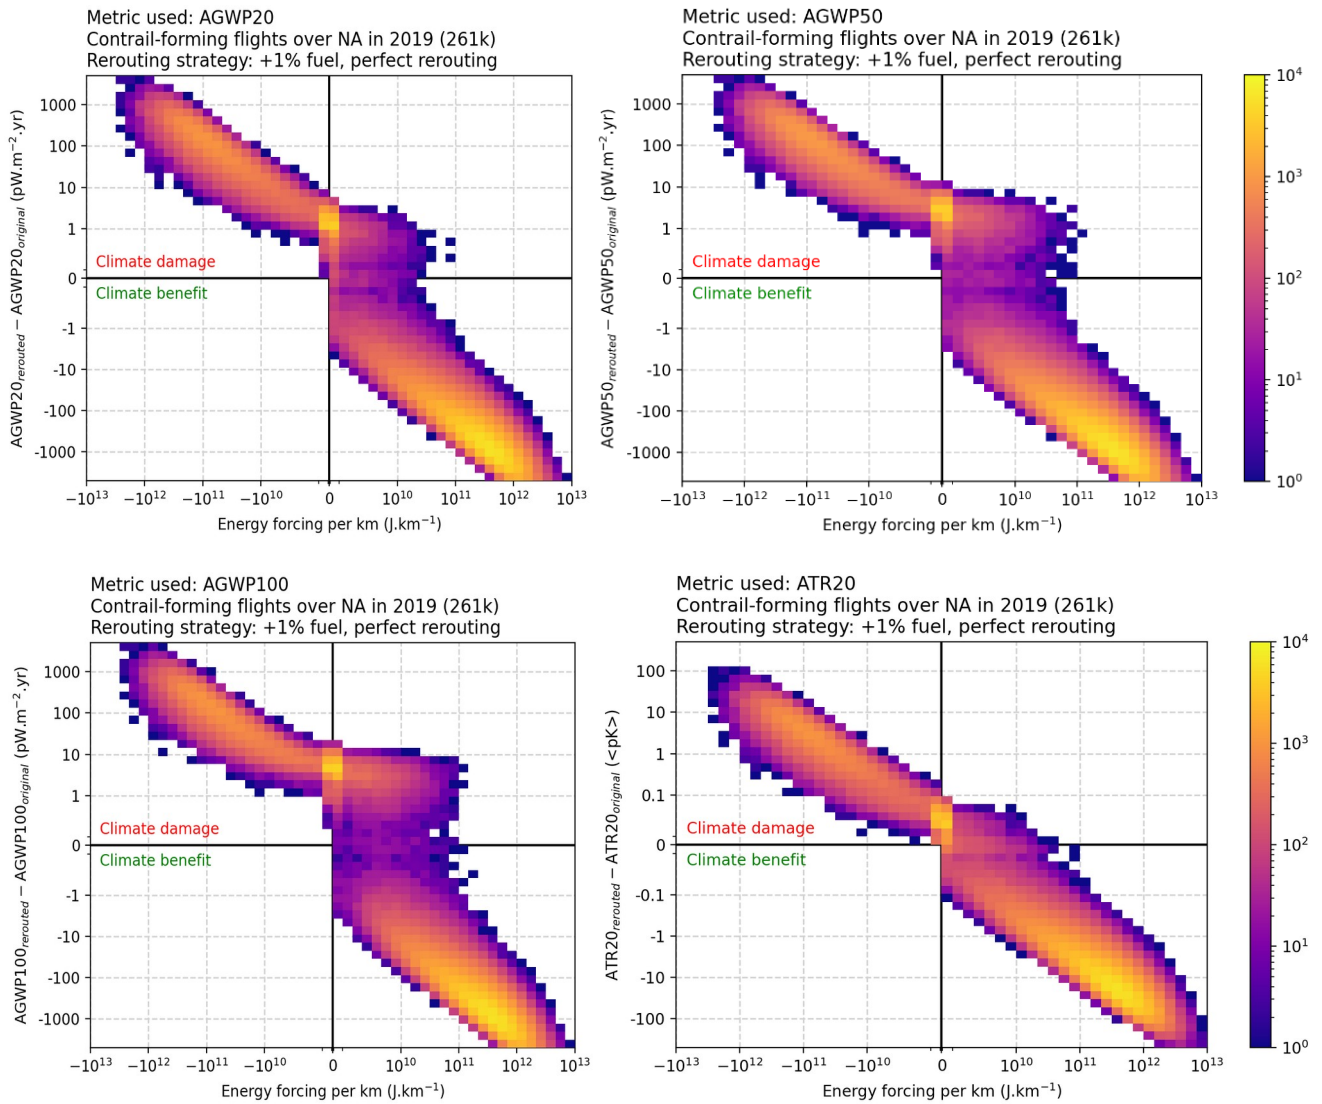

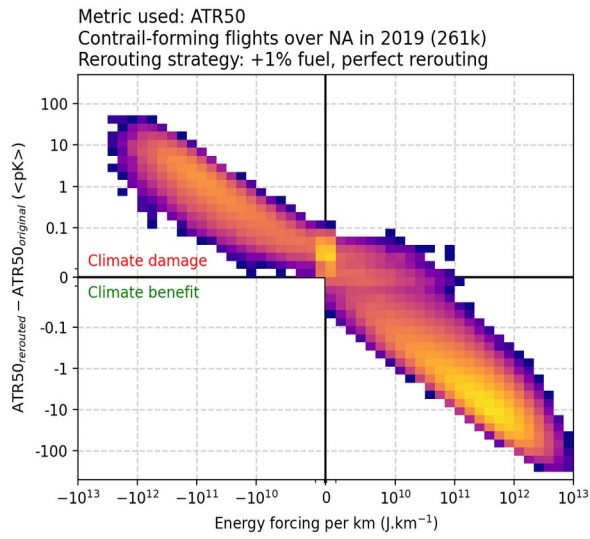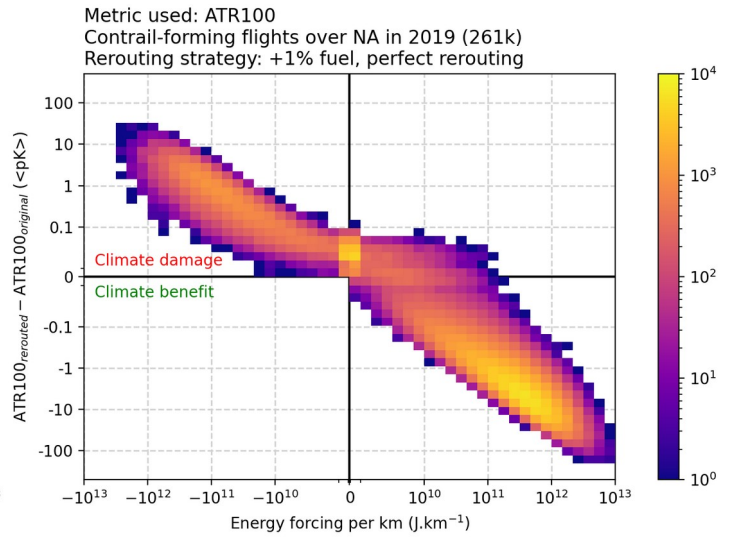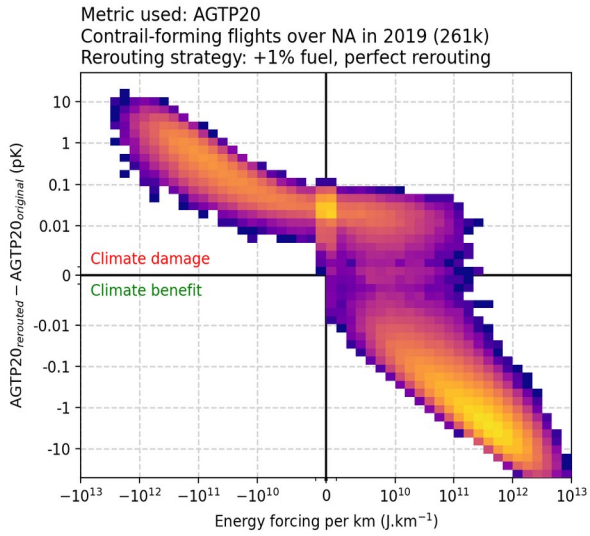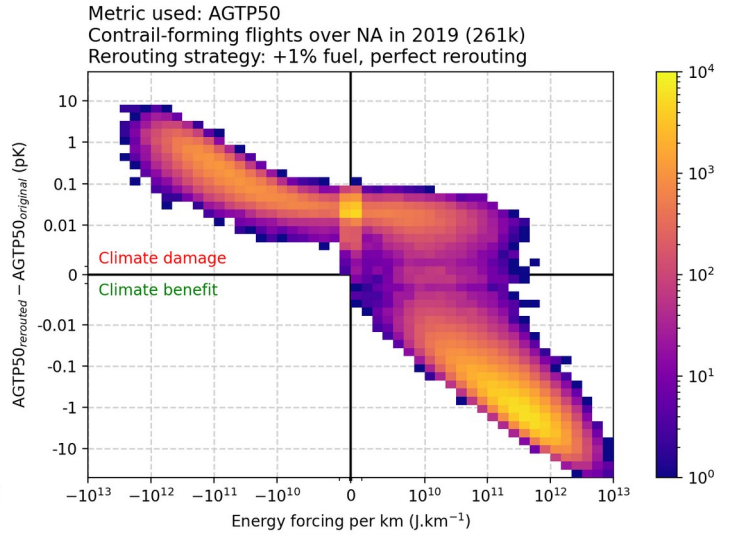

Supplement: Supplementary file 1 [file acp-24-9401-2024-supplement.pdf]
